# Decentralized multi-site VBM analysis during adolescence shows structural changes linked to age, body mass index, and smoking: A COINSTAC analysis

Harshvardhan Gazula<sup>\*(1)</sup>, Bharath Holla<sup>(2)</sup>, Zuo Zhang<sup>(3)</sup>, Jiayuan Xu<sup>(3)</sup>, Eric Verner<sup>(1)</sup>,  
Ross Kelly<sup>(1)</sup>, Gunter Schumann<sup>(3)</sup>, Vince D. Calhoun<sup>(1)</sup>

(1) Tri-institutional Center for Translational Research in Neuroimaging and Data Science (TReNDS):  
Georgia State University, Georgia Institute of Technology, Emory University, Atlanta, GA, USA

(2) CIMER, National Institute of Mental Health and Neurosciences (NIMHANS), Bangalore, India

(3) King's College London, MRC Social, Genetic, and Developmental Psychiatry Centre,  
Institute of Psychiatry, London, UK

\*Corresponding Authors: H. Gazula ([hgazula@gsu.edu](mailto:hgazula@gsu.edu)), V. Calhoun ([vcalhoun@gsu.edu](mailto:vcalhoun@gsu.edu))

## Abstract

In the recent past, there has been an upward trend in developing frameworks that enable neuroimaging researchers to address challenging questions by leveraging data across multiple sites all over the world. One such framework, Collaborative Informatics and Neuroimaging Suite Toolkit for Anonymous Computation (COINSTAC), provides a platform to analyze neuroimaging data stored locally across multiple organizations without the need for pooling the data at any point during the analysis. In this paper, we perform a decentralized voxel-based morphometry analysis of structural magnetic resonance imaging data across two different sites to understand the structural changes in the brain as linked to age, body mass index and smoking. Results produced by the decentralized analysis are contrasted with similar findings in literature. This work showcases the potential benefits of performing multi-voxel and multivariate analyses of large-scale neuroimaging data located at multiple sites.

## 1 Introduction

Collecting neuroimaging data is expensive as well as time consuming [Landis et al., 2016]. Other significant challenges include the storage and computational resources needed which could prove costly as the volume of the data collected goes up. On the contrary, aggregating information from data across various sites not only makes the predictions more certain by increasing the sample size [Button et al., 2013], but also ensures reliability and validity of the results, and safeguards against data fabrication and falsification [Tenopir et al., 2011, Ming et al., 2017]. In the past few years, there has been a proliferation of efforts [Poldrack et al., 2013] towards enabling researchers to leverage data across multiple sites.

26 Plis et al. [Plis et al., 2016], proposed a web-based framework titled Collaborative Informatics  
27 and Neuroimaging Suite Toolkit for Anonymous Computation (COINSTAC) to such collaborative  
28 analysis of data from different sites. COINSTAC implements a privacy-preserving message passing  
29 infrastructure that allows large scale analysis of decentralized data. The results thus obtained are  
30 on par with those that would have been obtained if the data were in one place. Since, there is no  
31 pooling of data it also preserves the privacy of individual datasets.

32 One such decentralized analysis method available in the COINSTAC framework is voxel-based  
33 morphometry [Ashburner and Friston, 2000] which was already discussed in [Gazula et al., 2018]  
34 by conceptualizing some variants of the decentralized regression and validating on some publicly  
35 available dataset. In this paper, we showcase the power of COINSTAC framework by conducting  
36 a real-world decentralized VBM analysis of MRI data at two different sites to study structural  
37 changes in adolescent brain as linked to age, body mass index (BMI), and smoking.

38 Smoking is a major public health concern and an economic burden. It is well known that most  
39 adult smokers take up smoking during their adolescent years [Lydon et al., 2014]. However, very  
40 little is understood about the brain mechanisms that influence smoking behavior. It is important to  
41 understand the effects of smoking on cortical thickness or volume. Understanding the complex neu-  
42 ral processes underlying smoking and smoking-induced neural change could be critical to designing  
43 interventions to discourage such smoking behavior in adolescents [Ewing et al., 2016].

44 On the other hand, neuroimaging is becoming increasingly common in obesity research as  
45 investigators try to understand the neurological underpinnings of appetite and body weight in  
46 humans [Carnell et al., 2012]. This because a higher body mass index (BMI) is associated with  
47 structural brain changes, cognitive decline, and an increased risk of Alzheimer disease (AD) in late  
48 life [Cronk et al., 2010]. However, there is reason to suspect that the relationship between excess  
49 weight and structural brain differences is not limited to older adults [Gunstad et al., 2008].

50 Our contributions in this paper can thus be summarized as follows.

- 51 1. Showcasing decentralized voxel based morphometry on large datasets across multiple sites,  
52 IMAGEN from UK and cVEDA from India (more on this later), in the COINSTAC framework  
53 and some observations.
- 54 2. An understanding of the effects of smoking and body mass index on the structural changes  
55 in the brain with age via decentralized voxel-based morphometry.

56 The outline of the current paper is as follows: In section 2, we discuss the decentralized regression  
57 algorithm which forms the bedrock for the decentralized voxel based morphometry analysis followed  
58 by an overview of the COINSTAC framework. In section 3, we discuss the IMAGEN and cVEDA  
59 data used in this study. In sections 4 and 5, we present the results and discuss our whole experience  
60 with using the COINSTAC framework as well as what we found analyzing the results. We conclude  
61 with some final comments in section 6.

## 62 2 Methods

### 63 2.1 Decentralized VBM (i.e. voxelwise decentralized regression)

64 Voxel-based morphometry (VBM) [Ashburner and Friston, 2000] is a statistical method that fa-  
65 cilitates a comprehensive comparison, via generalized linear modeling, of voxel-wise gray matter  
66 concentration between different groups, for example. To enable such statistical assessment on data  
67 present at various sites, it is important to develop decentralized tools.

68 The goal of decentralized regression (the building block of decentralized VBM) is to fit a linear  
69 equation (given by equation 1) relating the covariates at  $S$  different sites to the corresponding  
70 responses. Assume each site  $j$  has data set  $\mathcal{D}_j = \{(\mathbf{x}_i, y_i) : i \in \{1, 2, \dots, s_j\}\}$  where  $\mathbf{x}_{i,j} \in R^d$  is a  
71  $d$ -dimensional vector of real-values features, and  $y_j \in \mathbb{R}$  is a response. We consider fitting the model  
72 in equation 2 where  $\mathbf{w}$  is given as  $[\mathbf{w}; b]$  and  $\mathbf{x}$  as  $[\mathbf{x}; 1]$

$$y \approx \mathbf{w}^\top \mathbf{x} + b \quad (1)$$

$$\mathbf{y} \approx \mathbf{w}^\top \mathbf{x} \quad (2)$$

73 The vector of regression parameters/weights  $\mathbf{w}$  is found by minimizing the sum of the squared  
74 error given in equation 3

$$F(\mathbf{w}) = \sum_{j=1}^S \sum_{i=1}^{s_j} (y_i - \mathbf{w}^\top \mathbf{x}_{i,j})^2 \quad (3)$$

75 The regression objective function is a linearly separable function, that can be written as sum  
76 of a local objective function calculated at each local site as follows:

$$F(\mathbf{w}) = \sum_{j=1}^S F_j(\mathbf{w}) \quad (4)$$

77 where

$$F_j(\mathbf{w}) = \sum_{i=1}^{s_j} (y_i - \mathbf{w}^\top \mathbf{x}_{i,j}) \quad (5)$$

78 A central aggregator (*AGG*) computes the global minimizer  $\hat{\mathbf{w}}$  of  $F(\mathbf{w})$ .

#### 79 2.1.1 Decentralized Regression with Normal Equation

80 For a standard regression problem of the form given in equation 2, the analytical solution is given  
81 as

$$\hat{\mathbf{w}} = (\mathbf{x}^\top \mathbf{x})^{-1} \mathbf{x}^\top \mathbf{y} \quad (6)$$

82 Assuming that the augmented data matrix  $\mathbf{x}$  is made up of data from different local sites, i.e.

$$\mathbf{x} = \begin{bmatrix} \mathbf{x}_1 \\ \vdots \\ \mathbf{x}_S \end{bmatrix} \quad (7)$$

83 it's easy to see that  $\hat{\mathbf{w}}$  can be written as

$$\hat{\mathbf{w}} = \left( \begin{bmatrix} \mathbf{x}_1^\top & \cdots & \mathbf{x}_S^\top \end{bmatrix} \begin{bmatrix} \mathbf{x}_1 \\ \vdots \\ \mathbf{x}_S \end{bmatrix} \right)^{-1} \times \begin{bmatrix} \mathbf{x}_1^\top & \cdots & \mathbf{x}_S^\top \end{bmatrix} \begin{bmatrix} \mathbf{y}_1 \\ \vdots \\ \mathbf{y}_s \end{bmatrix} \quad (8)$$

$$\hat{\mathbf{w}} = \left( \sum_{j=1}^S \mathbf{x}_j^\top \mathbf{x}_j \right)^{-1} \times \left( \sum_{j=1}^S \mathbf{x}_j^\top \mathbf{y}_j \right) \quad (9)$$

84 The above variant of the analytical solution to a regression model shows that even if the data  
85 resides in different locations, fitting a global model in the presence of site covariates delivers results  
86 that are exactly similar to the pooled case.

---

**Algorithm 1** Decentralized Regression with Normal Equation

---

**Require:** Data  $\mathcal{D}_j$  at site  $j$  for sites  $j = 1, 2, \dots, S$ , where  $|\mathcal{D}_j| = s_j \forall j$

- 1: **for**  $j = 1$  to  $S$  **do**
- 2:     Compute  $Cov(X_j) = \mathbf{x}_j^\top \mathbf{x}_j$
- 3:     Compute  $\mathbf{x}_j^\top \mathbf{y}_j$
- 4:     Node  $j$  sends  $Cov(X_j)$  and  $\mathbf{x}_j^\top \mathbf{y}_j$  to AGG.
- 5: **end for**
- 6: AGG computes

$$\hat{\mathbf{w}} \leftarrow \left( \sum_{j=1}^S Cov(X_j) \right)^{-1} \left( \sum_{j=1}^S \mathbf{x}_j^\top \mathbf{y}_j \right) \text{ and return } \hat{\mathbf{w}}$$


---

87 **2.1.2 Other Statistics**

88 In addition to generating the weights of the covariates (regression parameters), one would also be  
89 interested in determining the overall model performance given by goodness-of-fit or the coefficient  
90 of determination ( $R^2$ ) as well as the statistical significance of each weight parameter ( $t$ -value or  
91  $p$ -value).

92 Determining  $R^2$  entails calculating the sum-square-of-errors ( $SSE$ ) as well as total sum of  
93 squares ( $SST$ ) which are evaluated at each local site and then aggregated at the global site to  
94 evaluate  $R^2$  given by  $1 - SSE/SST$ . An intermediary step before the calculation of  $SST$  is the

95 calculation of the global  $\bar{y}$  which is determined by taking a weighted average of the local  $\bar{y}_j$  weighted  
96 on the size of data at each local site.

97 The steps involved in calculating the  $t$ -values (and therefore  $p$ -values) of each regression param-  
98 eter are explained in [Gazula et al., 2018, Ming et al., 2017]. The global weight vector ( $\hat{w}$ ) is sent  
99 to each of the local sites where the local covariance matrix as well as the sum-square-of-errors is  
100 calculated and sent back along with the data size to the aggregator (*AGG*) which then utilizes that  
101 information to calculate the  $t$ -values for each parameter (or coefficient). Once, the  $t$ -values have  
102 been calculated, the corresponding two-tailed  $p$ -values can be deduced using any publicly available  
103 *distributions* library.

## 104 2.2 COINSTAC

### 105 2.2.1 Description

106 COINSTAC is an easy-to-install, standalone application with a user-friendly, simple, and intu-  
107 itive interface. It is open source and freely available for download from [https://github.com/](https://github.com/trendscenter/coinstac)  
108 [trendscenter/coinstac](https://github.com/trendscenter/coinstac). It is compatible with Windows, macOS, and Linux operating systems.  
109 The software utilizes docker containers (<https://www.docker.com/>) to run computations. Exam-  
110 ple of some computations currently available in COINSTAC are independent vector analysis (IVA)  
111 [Wojtalewicz et al., 2017], neural networks [Lewis et al., 2020, Lewis et al., 2017], decentralized  
112 stochastic neighbor embedding (dSNE) [Saha et al., 2017], joint independent component analy-  
113 sis (ICA) [Baker et al., 2015], and two-level differentially private support vector machine (SVM)  
114 classification [Sarwate et al., 2014].

### 115 2.2.2 Implementation

116 The first step to collaborating a decentralized analysis on the COINSTAC platform is creating an  
117 account (Figure 1) followed by creating a consortium. A consortium is a group of users who run  
118 a decentralized analysis together. Each member/site who's contributing data for a study create a  
119 login and all such members constitute a consortium. There's one consortium owner who creates  
120 the computation. Figure 2 shows an example of the COINSTAC consortium page where there is  
121 a card for each consortium containing its name, description, active pipeline, list of owner(s) and  
122 members, a button to view details about the consortium, and a button to join the consortium.

123 After a consortium has been created, the owner will be redirected to a Pipeline Creation page  
124 where he/she can define the model that will be used in the decentralized analysis. The consortium  
125 owner can choose the type of analysis (the computation) and then specify what variables are in the  
126 model (Figure 3).

127 Now that you the owner has created a pipeline, all members join the consortium and map their  
128 data to the variables in the model created earlier. At this point users will be taken to a Maps Page  
129 where they will be asked to point to the data to used for the analysis. When all the members are  
130 done mapping their data to the pipeline, the consortium owner is ready to start the computation.

## 131 **3 Data**

### 132 **3.1 IMAGEN**

133 The IMAGEN project is a longitudinal study of adolescent brain development and mental health in  
134 Europe [Schumann et al., 2010]. Participants were recruited from eight study sites in England, Ire-  
135 land, France and Germany. Each study site obtained ethical approval from the local research ethics  
136 committee. Written assent and consent were acquired from all the participants and the parents  
137 prior to participation. In this research, we used structural neuroimaging, BMI and questionnaire  
138 data acquired at age 14.

#### 139 **3.1.1 Measure of Smoking**

140 Measures of smoking were obtained from self-reports in the Fagerstrom Test for Nicotine Depen-  
141 dence (FTND) questionnaire [Heatherton et al., 1991]. The answer to the question regarding  
142 lifetime smoking experience was used create a binary variable, indicating whether the participant  
143 had ever smoked (labelled as 1) or not (labelled as 0).

#### 144 **3.1.2 Structural Magnetic Resonance Imaging**

145 High-resolution T1-weighted structural images were acquired using 3T MRI scanners (Siemens,  
146 Philips and General Electric) across all IMAGEN study sites. An MRI sequence based on the  
147 ADNI protocols (<http://adni.loni.usc.edu/methods/documents/mri-protocols/>) was used.  
148 Visual inspection was performed to exclude low-quality images (movement artefacts, brace artefacts  
149 and field inhomogeneities, etc.). Grey matter volumes (GMVs) were obtained from voxel-based  
150 morphometry (VBM) analysis, by using the VBM8 toolbox (<http://www.neuro.uni-jena.de/vbm/>).  
151 For the VBM analysis, structural images were first segmented into grey matter, white  
152 matter and cerebrospinal fluid. The DARTEL toolbox [Ashburner, 2007] was used to convert the  
153 images to the Montreal Neurological Institute (MNI) standard space. The grey matter volumes  
154 were modulated by the Jacobian determinant obtained from the previous step, and then smoothed  
155 with an 8mm-FWHM (full width at half maximum) Gaussian kernel.

### 156 **3.2 cVEDA**

157 The Consortium on Vulnerability to Externalising Disorders and Addiction (cVEDA) is a multi-site,  
158 collaborative, cohort study in India with an accelerated-longitudinal design and planned missing-  
159 ness approach that covers an age-span of 5-24 years 1. The cohort was setup to examine neurobe-  
160 havioural developmental trajectories and vulnerability to psychopathology, with a specific focus  
161 on externalising spectrum disorders. The cVEDA MRI sample comes from 6 sites with 3T MRI  
162 scanners. The T1w imaging protocol was adapted from the ADNI consortium (ADNI-2/ADNI-GO)  
163 [Beckett et al., 2015], while ensuring comparability to the European IMAGEN consortium. Partic-  
164 ipants from 3 sites (NIMHANS, SJRI, and RVRHC) scanned at the Bengaluru site at NIMHANS

165 using two MRI scanners (Siemens Skyra and Philips Ingenia). The remaining 3 MRI sites were  
166 at Chandigarh (Siemens Verio), Mysore (Philips Ingenia) and Kolkata (Siemens Verio). In this  
167 research, we used baseline T1w structural MRI scans from 1057 participants. Refer to Table 1 for  
168 sample characteristics and Table 2 for Acquisition Parameters. Each study site obtained ethical  
169 approval from the local research ethics committee. Written assent and consent were acquired from  
170 all the participants and the parents prior to participation.

### 171 3.2.1 Data Preprocessing

172 Visual inspection was performed to exclude low-quality images (movement artefacts, brace arte-  
173 facts and field inhomogeneities, etc.). AFNI’s “fat\_proc\_axialize\_anat” function was used for AC-PC  
174 alignment. The datasets were resampled (using a high-order sinc function to minimize smoothing)  
175 to a 1mm isotropic voxel size. Briefly, all AC-PC aligned 3D T1-weighted MRI scans were normal-  
176 ized using a linear affine followed by non-linear registration and corrected for bias field in homo-  
177 geneities, and then segmented into GM, WM, and CSF components. We used the Diffeomorphic  
178 Anatomic Registration Through Exponentiated Lie algebra algorithm (DARTEL) to normalize the  
179 segmented scans into a standard MNI space. The segmentations were then modulated by scaling  
180 with the amount of volume changes due to spatial registration to preserve tissue volume. Finally,  
181 the modulated grey matter segmentation was smoothed at 8mm\*\*3 FWHM Gaussian kernel 2.

182 Measures of smoking were obtained from WHO’s Alcohol, Smoking and Substance Involvement  
183 Screening Test (ASSIST) questionnaire that provides specific substance involvement score indicat-  
184 ing the risk levels. A binary variable for Lifetime Smoking was created with tobacco involvement  
185 score of  $\geq 3$  labelled as 1 (Present) and a score  $< 3$  was labelled as 0 (Absent).

## 186 4 Results

187 The use of a decentralized analytic framework like COINSTAC has many advantages. The final  
188 results are comparable to its pooled counterpart (where all the data is at one place) guaranteeing  
189 a virtual pooled analysis effect by a chain of computation and communication process. Other  
190 advantages include data privacy and support for large data

191 Once the two consortium members (IMAGEN and cVEDA) opened the COINSTAC applica-  
192 tion on their respective machines, joined the computation consortium and mapped the data, the  
193 consortium owner proceeds with starting the computation and it roughly took 30-45 minutes of  
194 computation time to finish the whole decentralized analysis and for the results to be displayed on  
195 the output screen as well as be downloaded for further processing. As noted earlier, a decentralized  
196 VBM was performed to understand the brain structural changes linked to BMI and smoking. Two  
197 separate models were run for the purpose of this analysis viz., age + BMI and age + smoking.  
198 Gender and site covariates were also included in both the models.

199 We will provide a quick summary of the results here and will discuss them further in the  
200 following section. Please note that all the maps have been thresholded with a 0.05 FDR correction



201 [Benjamini and Hochberg, 1995]. A decentralized VBM of the structural MRI data for the effects  
202 of smoking indicates that non-smokers have higher gray matter concentration in the right anterior  
203 cingulate cortex, bilateral thalamus and brainstem, as well as the left dorsal prefrontal cortex in  
204 addition to an increase in precuneus (see Figure 4). On the other hand, for a model with BMI,  
205 Figure 5, we see increases in bilateral putamen, bilateral hypothalamus as well as lateral and medial  
206 temporal lobes on both sides. Although the age covariate was included in both the models, the  
207 effects of age for both smoking and BMI look similar and hence we report the results from only  
208 one model. From Figure 6, for age, we see widespread decreases in gray matter (weighted more  
209 towards frontal) with bilateral increases in hippocampus.

## 210 5 Discussion

211 The goal of this paper was two-fold: to demonstrate the feasibility of COINSTAC for performing  
212 decentralized analysis on a large data present across multiple sites and to use this experiment to  
213 understand the influence of smoking and BMI on brain structural changes. With that, we surmise  
214 this was a useful exercise working with real users of the COINSTAC application and we believe  
215 the success of this exercise culminating with this writing will spawn more fruitful collaborations  
216 going forward. Overall, in the words of the users (IMAGEN and cVEDA), the ability to examine  
217 the voxel-wise effects as against the traditional ROI-wise summary effects across multiple sites  
218 with data-privacy issues handled and with efficient decentralized computations is what they found  
219 unique and an exciting prospect for further collaborations. From a development standpoint, it  
220 was a great experience for the developers of the COINSTAC application as it gave them a unique  
221 insight into how the research conversations happen and would serve them well in easing out the  
222 user experience associated with the use of COINSTAC.

223 We reckon that the results in this study were consistent with existing findings from literature.  
224 In addition, they extend some findings which we will discuss here under. We noted earlier that  
225 non-smokers have higher gray matter concentration in the right anterior cingulate cortex, bilateral  
226 thalamus and brainstem, as well as the left dorsal prefrontal cortex in addition to an increase in  
227 precuneus. From literature, orbitofrontal cortex and smoking association is fairly understandable  
228 with links to impulsivity/decision making and supported by literature. However, the causal rela-  
229 tionship is yet debatable. Olfactory cortex involvement is slightly novel given the large N in this  
230 study, but has been linked to smoking previously [Schriever et al., 2013].

231 While studying the influence of BMI, we reported seeing increases in bilateral putamen, bilateral  
232 hypothalamus as well as lateral and medial temporal lobes on both sides. This is an intriguing  
233 finding indicating there could be a non-linear effect. In one previous study, BMI correlated with  
234 brain activity in the left putamen, amygdala and insula in an inverted U-shaped manner [Dietrich  
235 et al., 2016]. The hypothalamic link to BMI is interesting as well, as the hypothalamic centers have  
236 a role in regulating food intake. However the reported literature points towards an atrophy rather  
237 than an increase with BMI [Kurth et al., 2013]. They report a negative correlation with BMI and



238 waist circumference. However, the BMI range in their work was 18.18 to 42.37, thereby making  
239 it unlikely that had a problem with non-linearity of effects as they did not have low BMI group  
240 (< 18.5). We surmise that this effect maybe specific for adolescents, where hypothalamic volume  
241 increases with BMI and then starts reducing with chronic obesity in adulthood.

242 We also reported that there's a widespread decrease in gray matter (weighted more towards  
243 frontal) with bilateral increases in hippocampus. Gray matter volume reduction in adolescence is  
244 fairly straightforward and is linked to maturation (cortical thinning/synaptic pruning/increase in  
245 underlying WM etc). However, the DMN localization of VBM-related grey matter reduction in  
246 adolescence is a fascinating insight. Maturation of the association cortices continues well into the  
247 adolescence. DMN mainly involves regions of the association cortex, and evolutionarily speaking,  
248 these regions are placed at an increased spatial distance from sensory-motor areas, the latter ma-  
249 turing much earlier. The "tethering hypothesis" [Buckner et al., 2013] suggests this aspect of DMN  
250 allows cognition to become more decoupled from sensory(perception)-motor(action) cycles. The  
251 hippocampal volume increase looks clear and it reaches a plateau only by mid adulthood.

## 252 **6 Conclusion**

253 In this paper, we showcased the power of COINSTAC in enabling neuroimaging researcher to answer  
254 important research questions by performing a multi-site study without having to pool the data.  
255 Decentralized voxel-based morphometric analysis of structural magnetic resonance imaging data  
256 from two different sites in UK and INDIA revealed some interesting insights into the gray matter  
257 concentrations in adolescent brains as a function of age, body mass index and smoking. Other  
258 advantages of such a decentralized platform include data privacy and support for large data. In  
259 conclusion, the results presented here strongly encourage the use of decentralized algorithms in large  
260 neuroimaging studies over systems that are optimized for large-scale centralized data processing.

## 261 **7 Conflict of interest**

262 The authors declare no conflict of interest.

## 263 **8 Acknowledgments**

264 This work was funded by the National Institutes of Health (grant numbers: P20GM103472/5P20RR021938,  
265 R01EB005846, 1R01DA040487) and the National Science Foundation (grant numbers: 1539067 and  
266 1631819).

## 267 **9 Author Contributions**

268 HG implemented the decentralized regression algorithms on structural MRI data and the manuscript  
269 writing. BH, and ZZ contributed data to the study as well as contributed to some parts of the

270 writing. EV contributed to performing the analysis and organizing the results. RK developed  
271 the software for the COINSTAC platform. GS is a co-investigator and has been instrumental in  
272 facilitating this multi-site study. VC led the team and formed the vision and also helped interpret  
273 the results.

## 274 References

- 275 [Ashburner, 2007] Ashburner, J. (2007). A fast diffeomorphic image registration algorithm. *Neu-*  
276 *roimage*, 38(1):95–113.
- 277 [Ashburner and Friston, 2000] Ashburner, J. and Friston, K. J. (2000). Voxel-based morphome-  
278 try—the methods. *Neuroimage*, 11(6):805–821.
- 279 [Baker et al., 2015] Baker, B. T., Silva, R. F., Calhoun, V. D., Sarwate, A. D., and Plis, S. M.  
280 (2015). Large scale collaboration with autonomy: Decentralized data ica. In *2015 IEEE 25th*  
281 *International Workshop on Machine Learning for Signal Processing (MLSP)*, pages 1–6. IEEE.
- 282 [Beckett et al., 2015] Beckett, L. A., Donohue, M. C., Wang, C., Aisen, P., Harvey, D. J., Saito,  
283 N., Initiative, A. D. N., et al. (2015). The alzheimer’s disease neuroimaging initiative phase  
284 2: Increasing the length, breadth, and depth of our understanding. *Alzheimer’s & Dementia*,  
285 11(7):823–831.
- 286 [Benjamini and Hochberg, 1995] Benjamini, Y. and Hochberg, Y. (1995). Controlling the false  
287 discovery rate: a practical and powerful approach to multiple testing. *Journal of the Royal*  
288 *statistical society: series B (Methodological)*, 57(1):289–300.
- 289 [Buckner et al., 2013] Buckner, R. L., Krienen, F. M., and Yeo, B. T. (2013). Opportunities and  
290 limitations of intrinsic functional connectivity mri. *Nature neuroscience*, 16(7):832.
- 291 [Button et al., 2013] Button, K. S., Ioannidis, J. P., Mokrysz, C., Nosek, B. A., Flint, J., Robinson,  
292 E. S., and Munafò, M. R. (2013). Power failure: why small sample size undermines the reliability  
293 of neuroscience. *Nature Reviews Neuroscience*, 14(5):365.
- 294 [Carnell et al., 2012] Carnell, S., Gibson, C., Benson, L., Ochner, C., and Geliebter, A. (2012).  
295 Neuroimaging and obesity: current knowledge and future directions. *Obesity Reviews*, 13(1):43–  
296 56.
- 297 [Cronk et al., 2010] Cronk, B. B., Johnson, D. K., Burns, J. M., Initiative, A. D. N., et al. (2010).  
298 Body mass index and cognitive decline in mild cognitive impairment. *Alzheimer disease and*  
299 *associated disorders*, 24(2):126.
- 300 [Dietrich et al., 2016] Dietrich, A., Hollmann, M., Mathar, D., Villringer, A., and Horstmann, A.  
301 (2016). Brain regulation of food craving: relationships with weight status and eating behavior.  
302 *International journal of obesity*, 40(6):982.

- 303 [Ewing et al., 2016] Ewing, S. W. F., Tapert, S. F., and Molina, B. S. (2016). Uniting adolescent  
304 neuroimaging and treatment research: Recommendations in pursuit of improved integration.  
305 *Neuroscience & Biobehavioral Reviews*, 62:109–114.
- 306 [Gazula et al., 2018] Gazula, H., Baker, B., Damaraju, E., Plis, S. M., Panta, S. R., Silva, R. F.,  
307 and Calhoun, V. D. (2018). Decentralized analysis of brain imaging data: Voxel-based morphom-  
308 etry and dynamic functional network connectivity. *Frontiers in neuroinformatics*, 12:55.
- 309 [Gunstad et al., 2008] Gunstad, J., Paul, R. H., Cohen, R. A., Tate, D. F., Spitznagel, M. B.,  
310 Grieve, S., and Gordon, E. (2008). Relationship between body mass index and brain volume in  
311 healthy adults. *International Journal of Neuroscience*, 118(11):1582–1593.
- 312 [Heatherton et al., 1991] Heatherton, T. F., Kozlowski, L. T., Frecker, R. C., and FAGERSTROM,  
313 K.-O. (1991). The fagerström test for nicotine dependence: a revision of the fagerstrom tolerance  
314 questionnaire. *British journal of addiction*, 86(9):1119–1127.
- 315 [Kurth et al., 2013] Kurth, F., Levitt, J. G., Phillips, O. R., Luders, E., Woods, R. P., Mazziotta,  
316 J. C., Toga, A. W., and Narr, K. L. (2013). Relationships between gray matter, body mass  
317 index, and waist circumference in healthy adults. *Human brain mapping*, 34(7):1737–1746.
- 318 [Landis et al., 2016] Landis, D., Courtney, W., Dieringer, C., Kelly, R., King, M., Miller, B., Wang,  
319 R., Wood, D., Turner, J. A., and Calhoun, V. D. (2016). Coins data exchange: An open platform  
320 for compiling, curating, and disseminating neuroimaging data. *NeuroImage*, 124:1084–1088.
- 321 [Lewis et al., 2020] Lewis, N., Gazula, H., Plis, S. M., and Calhoun, V. D. (2020). Decentral-  
322 ized distribution-sampled classification models with application to brain imaging. *Journal of*  
323 *neuroscience methods*, 329:108418.
- 324 [Lewis et al., 2017] Lewis, N., Plis, S., and Calhoun, V. (2017). Cooperative learning: Decentralized  
325 data neural network. In *2017 International Joint Conference on Neural Networks (IJCNN)*, pages  
326 324–331, Anchorage, AK.
- 327 [Lydon et al., 2014] Lydon, D. M., Wilson, S. J., Child, A., and Geier, C. F. (2014). Adoles-  
328 cent brain maturation and smoking: what we know and where we’re headed. *Neuroscience &*  
329 *Biobehavioral Reviews*, 45:323–342.
- 330 [Ming et al., 2017] Ming, J., Verner, E., Sarwate, A., Kelly, R., Reed, C., Kahleck, T., Silva, R.,  
331 Panta, S., Turner, J., Plis, S., et al. (2017). Coinstac: Decentralizing the future of brain imaging  
332 analysis. *F1000Research*, 6:1512.
- 333 [Plis et al., 2016] Plis, S. M., Sarwate, A. D., Wood, D., Dieringer, C., Landis, D., Reed, C., Panta,  
334 S. R., Turner, J. A., Shoemaker, J. M., Carter, K. W., et al. (2016). Coinstac: a privacy enabled  
335 model and prototype for leveraging and processing decentralized brain imaging data. *Frontiers*  
336 *in neuroscience*, 10:365.

- 337 [Poldrack et al., 2013] Poldrack, R. A., Barch, D. M., Mitchell, J., Wager, T., Wagner, A. D.,  
338 Devlin, J. T., Cumba, C., Koyejo, O., and Milham, M. (2013). Toward open sharing of task-  
339 based fmri data: the openfmri project. *Frontiers in neuroinformatics*, 7:12.
- 340 [Saha et al., 2017] Saha, D. K., Calhoun, V. D., Panta, S. R., and Plis, S. M. (2017). See without  
341 looking: joint visualization of sensitive multi-site datasets. In *Proceedings of the Twenty-Sixth*  
342 *International Joint Conference on Artificial Intelligence (IJCAI'2017)*, pages 2672–2678, Mel-  
343 bourne, Australia.
- 344 [Sarwate et al., 2014] Sarwate, A. D., Plis, S. M., Turner, J. A., Arbabshirani, M. R., and Calhoun,  
345 V. D. (2014). Sharing privacy-sensitive access to neuroimaging and genetics data: a review and  
346 preliminary validation. *Frontiers in neuroinformatics*, 8:35.
- 347 [Schriever et al., 2013] Schriever, V. A., Reither, N., Gerber, J., Iannilli, E., and Hummel, T.  
348 (2013). Olfactory bulb volume in smokers. *Experimental brain research*, 225(2):153–157.
- 349 [Schumann et al., 2010] Schumann, G., Loth, E., Banaschewski, T., Barbot, A., Barker, G.,  
350 Büchel, C., Conrod, P., Dalley, J., Flor, H., Gallinat, J., et al. (2010). The imagen study:  
351 reinforcement-related behaviour in normal brain function and psychopathology. *Molecular psy-*  
352 *chiatry*, 15(12):1128.
- 353 [Tenopir et al., 2011] Tenopir, C., Allard, S., Douglass, K., Aydinoglu, A. U., Wu, L., Read, E.,  
354 Manoff, M., and Frame, M. (2011). Data sharing by scientists: practices and perceptions. *PloS*  
355 *one*, 6(6):e21101.
- 356 [Wojtalewicz et al., 2017] Wojtalewicz, N. P., Silva, R. F., Calhoun, V. D., Sarwate, A. D., and  
357 Plis, S. M. (2017). Decentralized independent vector analysis. In *2017 IEEE International*  
358 *Conference on Acoustics, Speech and Signal Processing (ICASSP)*, pages 826–830, New Orleans,  
359 USA. IEEE.

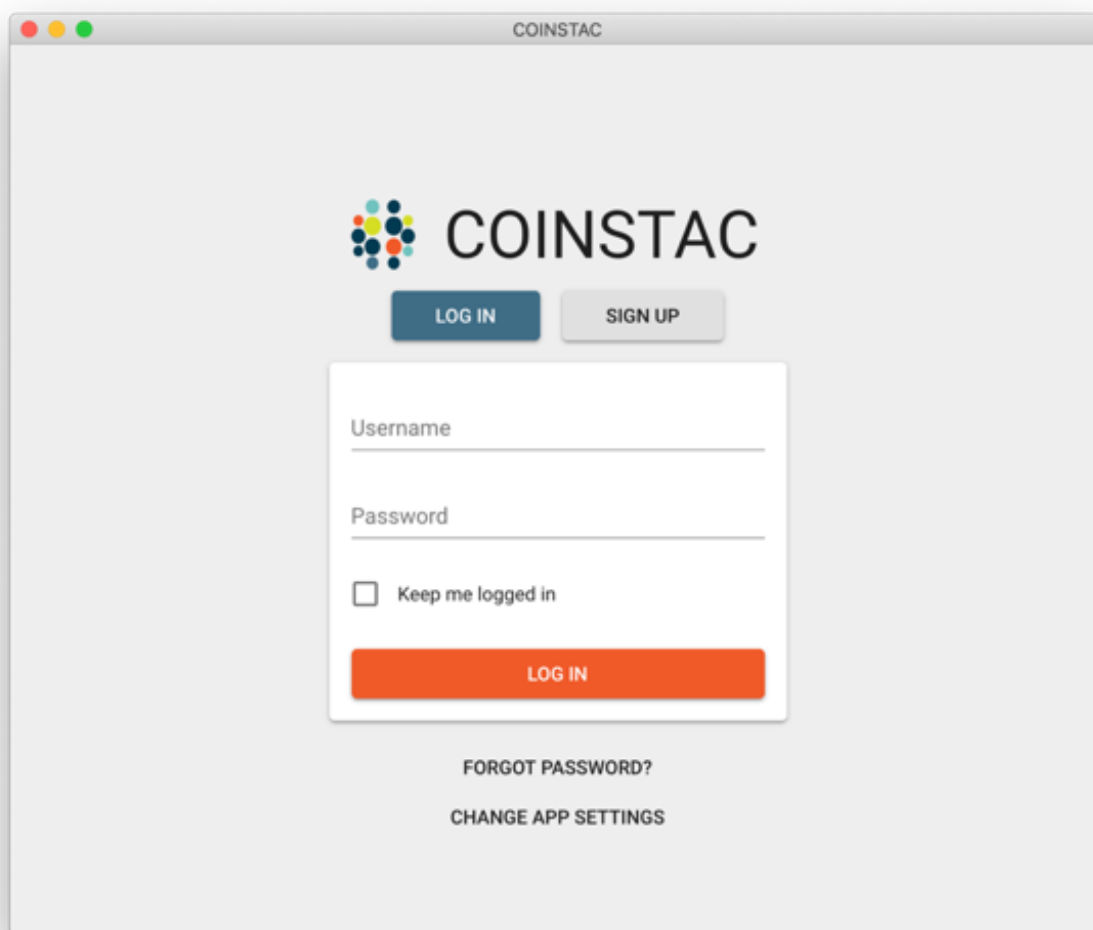

Figure 1: COINSTAC application login/home page

Table 1: Simple Statistics from cVEDA data

| Variable                | Mean (SD), [Range]                |
|-------------------------|-----------------------------------|
| <b>Age</b>              | 15.27 (4.29), [5 - 24]            |
| <b>Gender (M/F)</b>     | 582/439                           |
| <b>Lifetime Smoking</b> | 72 (7%)                           |
| <b>BMI</b>              | 19.43 (4.5), [10.55 - 43.73]      |
| <b>TICV</b>             | 1350.4 (130.5), [1084.5 - 1826.5] |

Table 2: Scanner parameters from cVEDA data

| Acq Seq | Site       | Scanner Model | dx (mm) | dy (mm) | dz (mm) | TR (ms) | TE (ms) | FA* | Matrix Size (mm) | Sag Slices |
|---------|------------|---------------|---------|---------|---------|---------|---------|-----|------------------|------------|
| A       | Mysuru     | Ingena        | 1.2     | 1       | 1       | 6.9     | 3.2     | 9   | 256×256          | 170        |
| B       | Bengaluru  | Ingenia       | 1.0     | 1       | 1       | 6.5     | 2.9     | 9   | 256×256          | 211        |
| C       | Bengaluru  | Skyra         | 1.2     | 1       | 1       | 2300    | 3       | 9   | 256×240          | 176        |
| D       | Kolkata    | Trio          | 1.2     | 1       | 1       | 2300    | 3       | 9   | 256×240          | 176        |
| E       | Chandigarh | Verio         | 1.2     | 0.5     | 0.5     | 2300    | 3       | 9   | 512×240          | 176        |

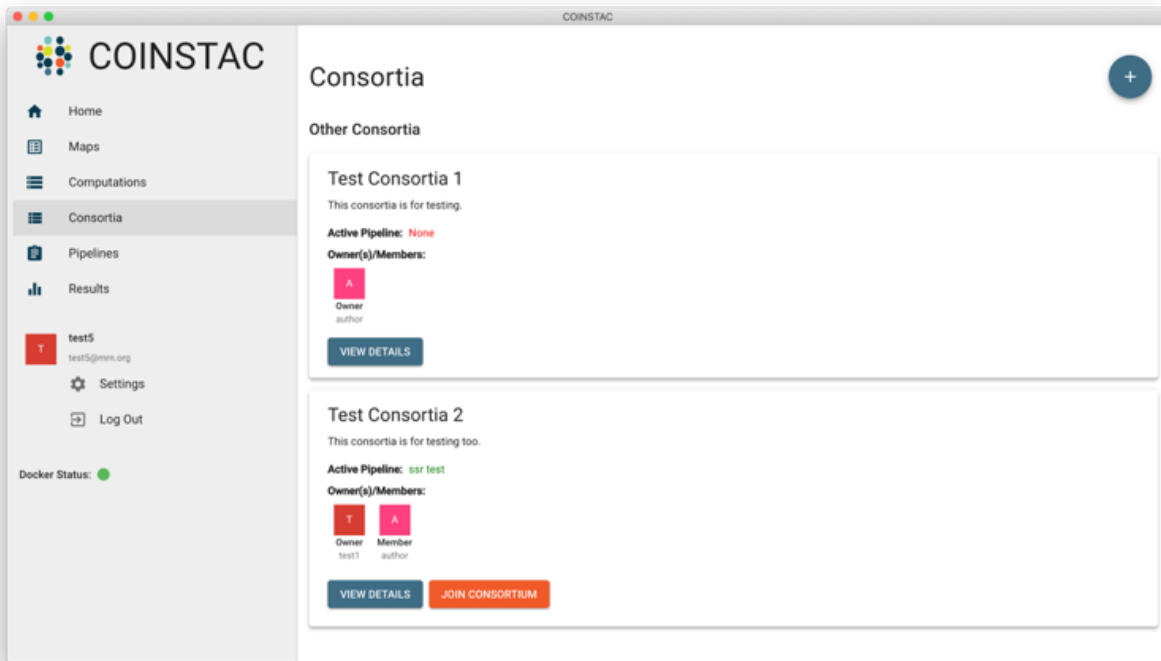

Figure 2: COINSTAC application Consortia page

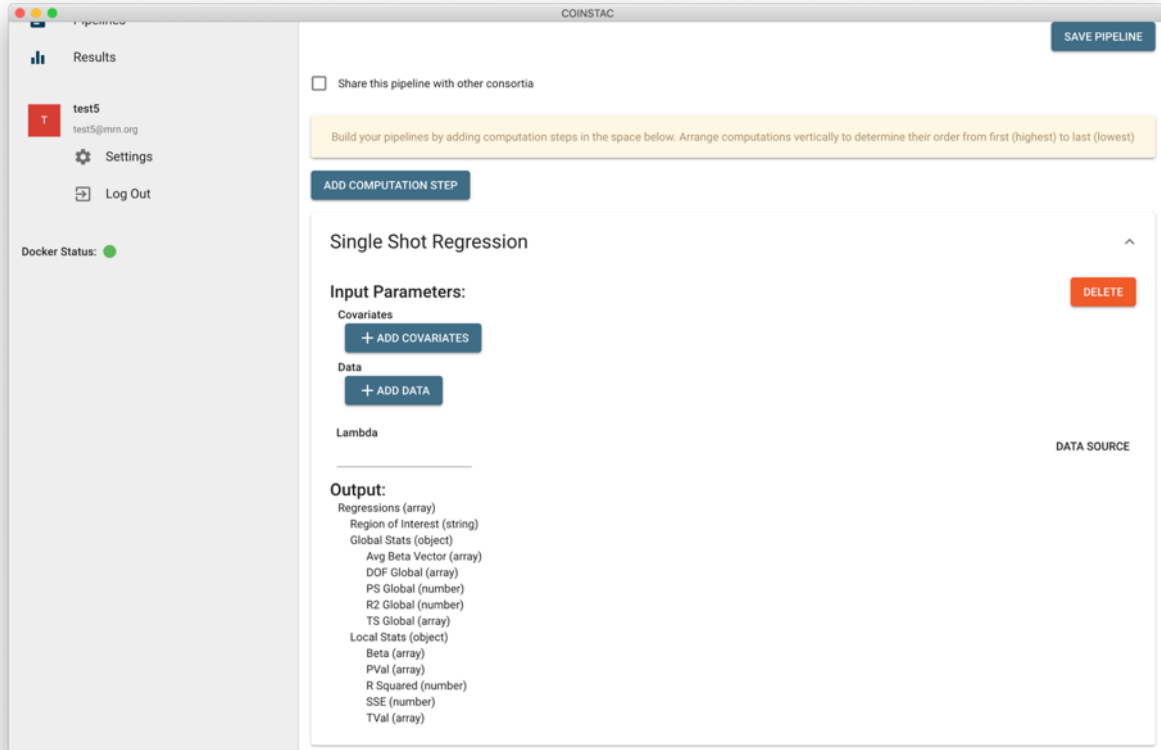

Figure 3: COINSTAC application Pipeline page

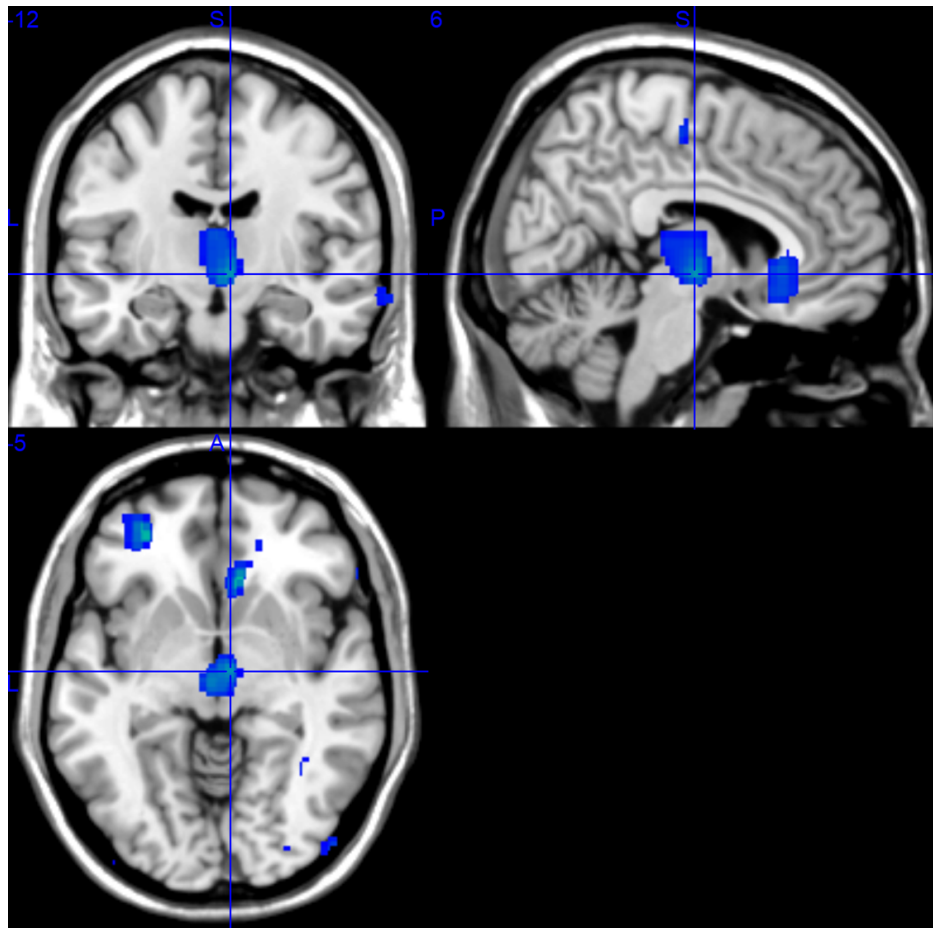

Figure 4: Rendered images of voxel-wise significance values ( $-\log_{10}p\text{-value} \times \text{sign}(t)$ ) for the covariate 'Smoking'.



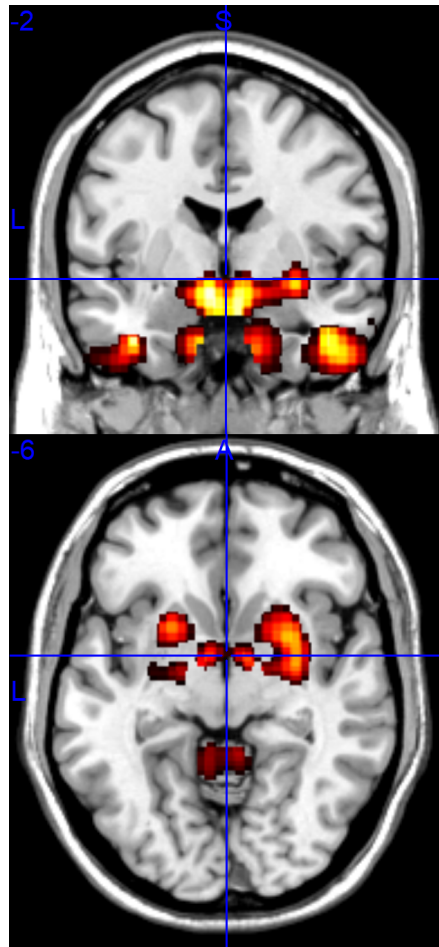

Figure 5: Rendered images of voxel-wise significance values ( $-\log_{10}p\text{-value} \times \text{sign}(t)$ ) for the covariate 'BMI'.

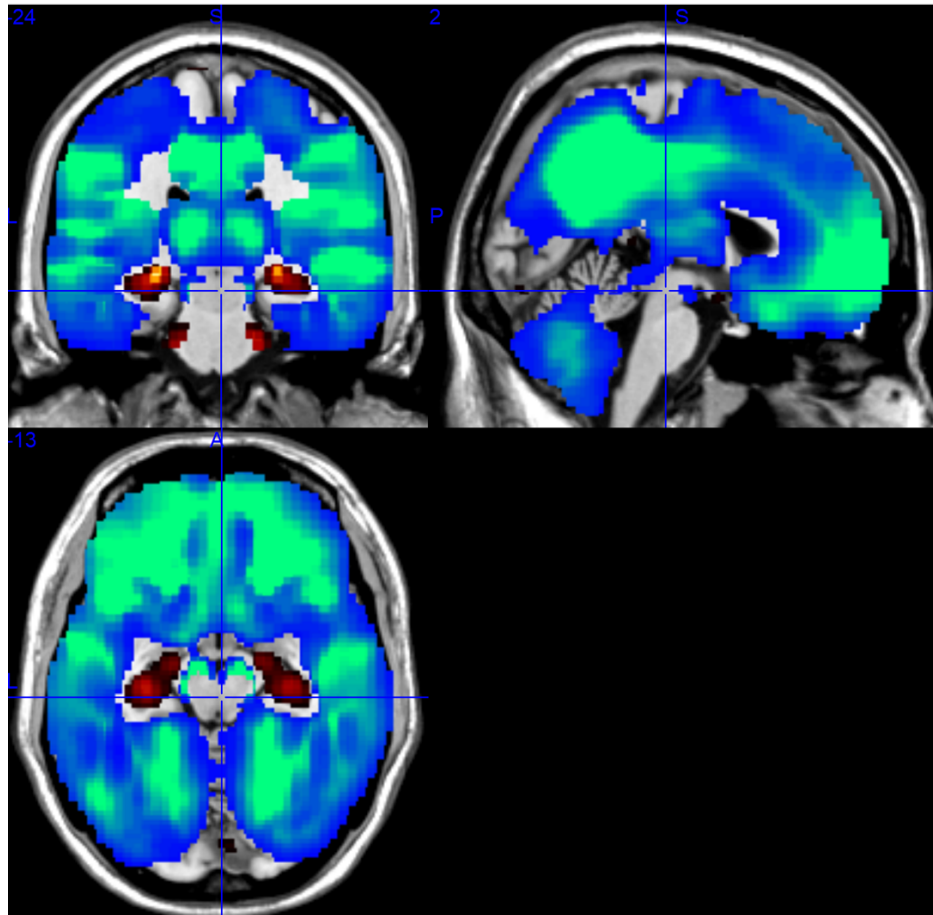

Figure 6: Rendered images of voxel-wise significance values ( $-\log_{10}p\text{-value} \times \text{sign}(t)$ ) for the covariate 'Age'.
